# Supplementary material for: Advances in Vaporized Hydrogen Peroxide Reusable Medical Device Sterilization Cycle Development: Technology Review and Patent Trends
Source: MDPI journal article supplement (doi:10.3390/microorganisms11102566), 2023-10-15
Supplement: s1 [file s1]

## Supplementary information

### Advances in vaporized hydrogen peroxide reusable medical device sterilization cycle development: Technology review and patent trends

M.R. Karimi Estahbanati

Université Laval, Chemical engineering department, 1065 avenue de la Médecine,  
Quebec, QC, G1V 0A6, Canada

Table S1. Summary of the parameters of Flexible cycle of V-PRO® maX 2 sterilizer.

| Phase                     |                                            | Initial<br>pressure<br>(Torr) | Final<br>pressure<br>(Torr) | Duration<br>(min) | Comment                                   |
|---------------------------|--------------------------------------------|-------------------------------|-----------------------------|-------------------|-------------------------------------------|
| <b>Moisture<br/>check</b> | Evacuation and<br>moisture<br>verification | -                             | 0.4                         | -                 | -                                         |
|                           | Conditioning                               | 0.4                           | < 0.4                       | -                 | If moisture available                     |
|                           | Moisture re-<br>verification               | -                             | -                           | -                 | If moisture available.<br>Abort if fails. |
| <b>Sterilize</b>          | H <sub>2</sub> O <sub>2</sub> injection    | 0.4                           | 6.3 - 15                    | -                 | -                                         |
|                           | Hold segment                               | -                             | -                           | 2                 | -                                         |
|                           | Air injection                              | -                             | 500                         | -                 | -                                         |
|                           | Hold segment                               | 500                           | 500                         | 1                 | -                                         |
|                           | Pressure<br>reduction                      | 500                           | 0.4                         | -                 | -                                         |
|                           | Re-evacuation<br>and re-<br>sterilization  | -                             | -                           | -                 | 3 repeats                                 |
| <b>Aerate</b>             | Aeration                                   | 1                             | -                           | -                 | -                                         |

Table S2. Summary of 510(k) premarket notification clearances of STERRAD 100NX and NX as well as V-Pro Max and S series sterilizers.

| Manufacturer | Device name                                        | 510(k) number | Decision date | Modification                                                                            |
|--------------|----------------------------------------------------|---------------|---------------|-----------------------------------------------------------------------------------------|
| ASP          | Sterrad Nx With Allclear Technology                | K220404       | 05/16/2022    | An expansion of existing claims. No cycle modification.                                 |
|              | STERRAD® 100NX Sterilizer with ALLClear Technology | K212174       | 10/09/2021    | An expansion of existing claims. No cycle modification.                                 |
|              | Sterrad NX Sterilizer                              | K162007       | 02/16/2017    | Vacuum pump and associated mounting components modification. No cycle modification.     |
|              | Sterrad® NX Sterilizer With Allclear Technology    | K160818       | 09/27/2016    | Addition of Load Conditioning Feature. Do not modify the existing sterilization cycles. |
|              | Sterrad 100NX Sterilizer with Allclear Technology  | K160903       | 09/26/2016    | Addition of Load Conditioning Feature. Do not modify the existing sterilization cycles. |
|              | Sterrad NX Sterilizer, Sterrad 100NX Sterilizer    | K151725       | 01/13/2016    | Microprocessor module change with no cycle modification.                                |
|              | Sterrad NX Sterilizer, Sterrad 100NX Sterilizer    | K142454       | 04/03/2015    | Software revision and upgraded CPU. No cycle modification.                              |
|              | Sterrad 100NX Sterilizer Duo Cycle                 | K111377       | 09/26/2012    | Addition of DUO Cycle.                                                                  |

|        |                                                                                                  |         |            |                                                                                     |
|--------|--------------------------------------------------------------------------------------------------|---------|------------|-------------------------------------------------------------------------------------|
|        | Sterrad 100NX Sterilizer                                                                         | K092622 | 03/04/2011 | Addition of Express Cycle.                                                          |
|        | Express Cycle                                                                                    |         |            |                                                                                     |
| Steris | V-Pro Max 2 Low Temperature Sterilization System, V-Pro S2 Low Temperature Sterilization System  | K222849 | 09/30/2022 | Same control but using slightly modified boards. No cycle modification.             |
|        | V-Pro Max 2 Low Temperature Sterilization System, V-Pro Max Low Temperature Sterilization System | K222093 | 09/09/2022 | Modification of indications for use. No cycle modification.                         |
|        | V-Pro Max 2 Low Temperature Sterilization System, V-Pro S2 Low Temperature Sterilization System  | K222543 | 08/25/2022 | Same control but using refurbished/slightly modified boards. No cycle modification. |
|        | V-Pro S2 Low Temperature Sterilization Systems                                                   | K190917 | 05/09/2019 | Modification of indications for use. No cycle modification.                         |
|        | V-Pro Max 2 Low Temperature Sterilization System, V-Pro Max Low Temperature Sterilization System | K190103 | 04/05/2019 | Modification of indications for use for the Lumen cycle. No cycle modification.     |

|                                      |       |     |         |            |                                                             |
|--------------------------------------|-------|-----|---------|------------|-------------------------------------------------------------|
| V-Pro<br>Temperature<br>System       | S2    | Low | K182568 | 01/03/2019 | Modification of indications for use. No cycle modification. |
| V-Pro<br>Temperature<br>System       | Max 2 | Low | K172754 | 02/09/2018 | Addition of the Fast Non Lumen Cycle.                       |
| V-Pro<br>Temperature<br>System       | Max   | Low | K172319 | 01/18/2018 | Modifications to labeling. No cycle modification.           |
| V-Pro<br>Temperature<br>System       | Max   | Low | K162413 | 03/31/2017 | Remove labeling restrictions. No cycle modification.        |
| V-Pro®<br>Temperature                | Max   | Low | K160433 | 07/06/2016 | Indications differ slightly. No cycle modification.         |
| V-Pro<br>Temperature<br>System       | Max   | Low | K131120 | 07/16/2013 | Indications of Lumen Cycle updated. No cycle modification.  |
| V-Pro<br>Temperature<br>System       | Max   | Low | K120632 | 06/26/2012 | Modification of Lumen Cycle claims. No cycle modification.  |
| Amsco V-Pro<br>Temperature<br>System | Max   | Low | K112813 | 12/01/2011 | Modification of Lumen Cycle claims. No cycle modification.  |

|                                                      |         |            |                                                            |
|------------------------------------------------------|---------|------------|------------------------------------------------------------|
| Amsco V-Pro Max Low Temperature Sterilization System | K112760 | 11/22/2011 | Modification of Lumen Cycle claims. No cycle modification. |
| Amsco V-Pro Max Low Temperature Sterilization System | K102330 | 08/12/2011 | Introduction of V-Pro Max by addition of Flexible Cycle.   |

---
